# 1 **Time-resolved dynamic optical coherence tomography for retinal** 2 **blood flow analysis**

3 Philippe Valmaggia<sup>1,2,3</sup>, Philippe C. Cattin<sup>1</sup>, Robin Sandkühler<sup>1</sup>, Nadja Inglin<sup>2</sup>,  
4 Tilman P. Otto<sup>4</sup>, Silke Aumann<sup>4</sup>, Michel M. Teussink<sup>4</sup>, Richard F. Spaide<sup>5</sup>,  
5 Hendrik P. N. Scholl<sup>2,3</sup>, Peter M. Maloca<sup>2,3</sup>

6 <sup>1</sup>Department of Biomedical Engineering, University of Basel, 4123 Allschwil,  
7 Switzerland

8 <sup>2</sup>Institute of Molecular and Clinical Ophthalmology Basel (IOB), Basel, 4031 Basel,  
9 Switzerland

10 <sup>3</sup>Department of Ophthalmology, University Hospital Basel, 4031 Basel, Switzerland

11 <sup>4</sup>Heidelberg Engineering GmbH, 69115 Heidelberg, Germany

12 <sup>5</sup>Vitreous Retina Macula Consultants of New York, NY 10022, USA

13

14 **Word count:** Abstract: 245; Manuscript: 4'218

15 **Corresponding author:** Philippe Valmaggia, Department of Biomedical  
16 Engineering, University of Basel, 4123 Allschwil, Switzerland. Email:  
17 philippe.valmaggia@unibas.ch

18 **Keywords:** time-resolved, dynamic, optical coherence tomography, retinal blood  
19 flow, flow velocity

20 **Commercial relationships:** PV received funding from the Swiss National Science  
21 Foundation (Grant 323530\_199395), the Janggen-Pöhn Stiftung and AlumniMedizin  
22 Basel and discloses personal compensation from Heidelberg Engineering GmbH.  
23 TPO, SA and MMT are salaried employees of Heidelberg Engineering GmbH, 69115  
24 Heidelberg, Germany. RFS discloses personal compensation from Topcon Medical  
25 Systems, Roche, Bayer, Heidelberg Engineering and Genentech. HPNS is  
26 supported by the Swiss National Science Foundation (Project funding: “Developing  
27 novel outcomes for clinical trials in Stargardt disease using structure/function  
28 relationship and deep learning” #310030\_201165, and National Center of  
29 Competence in Research Molecular Systems Engineering: “NCCR MSE: Molecular  
30 Systems Engineering (phase II)” #51NF40-182895), the Wellcome Trust (PINNACLE  
31 study), and the Foundation Fighting Blindness Clinical Research Institute (ProgStar  
32 study). HPNS is a member of the Scientific Advisory Board of Boehringer Ingelheim  
33 Pharma GmbH & Co; Claris Biotherapeutics Inc.; Eluminex Biosciences; Gyroscope  
34 Therapeutics Ltd.; Janssen Research & Development, LLC (Johnson & Johnson);  
35 Novartis Pharma AG (CORE); Okuvision GmbH; ReVision Therapeutics Inc.; and  
36 Saliogen Therapeutics Inc. HPNS is a consultant of: Alnylam Pharmaceuticals Inc.;  
37 Gerson Lehrman Group Inc.; Guidepoint Global, LLC; and Intergalactic Therapeutics  
38 Inc. HPNS is member of the Data Monitoring and Safety Board/Committee of Belite  
39 Bio (CT2019-CTN-04690-1), F. Hoffmann-La Roche Ltd (VELODROME trial,  
40 NCT04657289; DIAGRID trial, NCT05126966; HUTONG trial) and member of the  
41 Steering Committee of Novo Nordisk (FOCUS trial; NCT03811561). All  
42 arrangements have been reviewed and approved by the University of Basel  
43 (Universitätsspital Basel, USB) and the Board of Directors of the Institute of  
44 Molecular and Clinical Ophthalmology Basel (IOB), in accordance with their conflict-  
45 of-interest policies. Compensation is being negotiated and administered as grants by  
46 USB, which receives them on its proper accounts. HPNS is co-director of the  
47 Institute of Molecular and Clinical Ophthalmology Basel (IOB), which is constituted  
48 as a non-profit foundation and receives funding from the University of Basel, the  
49 University Hospital Basel, Novartis and the government of Basel-Stadt. PMM is a  
50 consultant of Roche and holds intellectual properties for machine learning at MIMO  
51 AG and VisionAI, Switzerland. Funding organisations had no influence on the  
52 design, performance or evaluation of the current study. The other authors declare no  
53 conflict.

54 **Abstract**

55 **Purpose:** Optical coherence tomography (OCT) representations in clinical practice  
56 are static and do not allow for a dynamic visualisation and quantification of blood  
57 flow. This study aims to present a method to analyse retinal blood flow dynamics  
58 using time-resolved structural optical coherence tomography (OCT).

59 **Methods:** We developed novel imaging protocols to acquire video-rate time-resolved  
60 OCT B-scans (1024 x 496 pixels, 10° field of view) at four different sensor integration  
61 times (integration time of 44.8  $\mu$ s at a nominal A-scan rate of 20 kHz, 22.4  $\mu$ s at 40  
62 kHz, 11.2  $\mu$ s at 85 kHz, 7.24  $\mu$ s at 125 kHz). The vessel centres were manually  
63 annotated for each B-scan and surrounding subvolumes were extracted. We used a  
64 velocity model based on signal-to-noise ratio (SNR) drops due to fringe washout to  
65 calculate blood flow velocity profiles in vessels within five optic disc diameters of the  
66 optic disc rim.

67 **Results:** Time-resolved dynamic structural OCT revealed pulsatile SNR changes in  
68 the analysed vessels and allowed the calculation of potential blood flow velocities at  
69 all integration times. Fringe washout was stronger in acquisitions with longer  
70 integration times; however, the ratio of the average SNR to the peak SNR inside the  
71 vessel was similar across all integration times.

72 **Conclusions:** We demonstrated the feasibility of estimating blood flow profiles  
73 based on fringe washout analysis, showing pulsatile dynamics in vessels close to the  
74 optic nerve head using structural OCT. Time-resolved dynamic OCT has the  
75 potential to uncover valuable blood flow information in clinical settings.

## 76 **Introduction**

77 Optical coherence tomography (OCT) is a technology that enables the visualisation  
78 of retinal structures on a micrometre scale.<sup>1,2</sup> Its benefits of being non-invasive, fast  
79 and easy to operate have made OCT become one of the most widely used imaging  
80 techniques, particularly in ophthalmology.<sup>3</sup> Since its first demonstration in 1991, OCT  
81 has been enhanced and nowadays, allows the visualisation of intravascular flow  
82 regions through OCT angiography (OCTA).<sup>4</sup> OCTA is based on the detection of OCT  
83 signal changes over time and allows the visualisation of chorioretinal vasculature  
84 down to the microvasculature in an unprecedented way.

85 However, the clinical representations of both OCT and OCTA are static. For  
86 visualising flow dynamics and analysing changes within single vessels over time,  
87 ophthalmologists and researchers must rely on other acquisition modalities such as  
88 Doppler OCT, laser speckle flowgraphy, the retinal function imager or variable  
89 interscan time analysis (VISTA) in macular OCTA.<sup>5-13</sup> These techniques are mostly  
90 used in specialised research centres and are not yet widely used in everyday clinical  
91 use. Due to the relatively high demands on technology and experience, they have  
92 not yet been implemented in a routine clinical application that can be used on a daily  
93 basis. However, the scan patterns in OCT devices are generally customisable and  
94 modifications would allow for dynamic acquisitions and visualisations in clinical  
95 settings. Sequentially acquired OCT signals at the same position particularly  
96 fluctuate within and in close proximity to vessels; accordingly, they have the greatest  
97 contribution to OCTA signal generation.<sup>4,14</sup>

98 The OCT signals are generated by measuring the interference pattern of reflected  
99 light waves from a sample and a reference mirror.<sup>1,15,16</sup> The reflected light waves  
100 interfere constructively or destructively, generating interference patterns of light and

101 dark bands which are called interference fringes<sup>15,17</sup> – appearing similar to the edge  
102 of a fabric fringe. When the sample or instrument moves during image acquisition,  
103 the phase of the reflected light changes. This modulation of the interference can  
104 cause the interference fringes to vanish, a phenomenon called fringe washout. The  
105 fringe washout leads to a signal-to-noise ratio (SNR) drop in the image, which tends  
106 to be larger in case of a larger sample motion.<sup>18–20</sup> This can occur at higher sample  
107 velocities or increased sensor integration times.<sup>18</sup> Taking advantage of the  
108 knowledge that fringe washout is directly linked to the velocity of the sample motion,  
109 we investigated the possibility of calculating flow profiles in time-resolved structural  
110 OCT data. An overview of the general principle of fringe washout can be found in  
111 Figure 1.

112 To investigate blood flow velocity, we modified the OCT scan patterns of a  
113 commercially available device to allow for time-resolved dynamic acquisitions.  
114 Furthermore, we analysed these images regarding the fringe washout and present  
115 dynamically calculated blood flow profiles.

## 116 **Methods**

### 117 **Data acquisition**

118 Data were acquired at the Augenarztpraxis Dr. Maloca in Lucerne, Switzerland. The  
119 study was performed according to the Declaration of Helsinki, and ethics approval  
120 was granted by the Ethics Committee of Northwestern and Central Switzerland  
121 (EKNZ 2021-02360). Written informed consent was obtained from all participants.

122 The images were acquired with a Heidelberg Spectralis OCT with an investigational  
123 acquisition module. The OCT volume acquisition pattern was modified to continuous  
124 B-scans with a 10° field of view without OCT tracking through the on-board dual-  
125 beam confocal scanning laser ophthalmoscope tracking system. This prevented  
126 irregular OCT B-scan acquisition due to compensatory OCT-beam steering by the  
127 tracking system, which has a variable time lag. The patients were informed about the  
128 acquisition procedure to ensure good image quality. The subjects were instructed to  
129 fixate on the foveal fixation target, close their eyes, blink once and then leave their  
130 eyes open. Acquisitions were performed for several seconds, where a manual press  
131 on the joystick of the OCT device allowed to start and end the acquisition. In the  
132 case of blinks or major ocular movements, the process was repeated.

133 The acquisitions were performed between the optic nerve head centre and five optic  
134 disc diameters (ODDs) from the optic nerve rim and graded by eccentricity 0–6 (0:  
135 optic nerve head centre, 1: neuroretinal rim, 2: 1 ODD superotemporal to the  
136 neuroretinal rim, 3: 2 ODDs, 4: 3 ODDs, 5: 4 ODDs, 6: 5 ODDs). The major visible  
137 vessels were imaged perpendicularly, so that the cross-section was visible.

138 All time-resolved acquisitions were performed with continuous B-scans, each single  
139 scan comprising 1024 A-scans with 496 pixels, with a 10° field of view. This allowed

140 the same B-scan to be repeated at the same location with a high sampling density  
141 over a longer period of time and still meet the requirements regarding light safety. All  
142 locations were acquired at four different A-scan integration times 44.8, 22.4, 11.2  
143 and 7.24  $\mu$ s, corresponding to nominal A-scan rates of 20, 40, 85 and 125 kHz,  
144 respectively. This enabled video-rate sequential B-scan acquisitions. Each separate  
145 B-scan was saved as a single image without averaging. Notably, the SNR in  
146 spectral-domain (SD) OCTs depends on the integration time according to the  
147 following established formula<sup>21–23</sup>:

$$148 \quad SNR_{SD} \sim (\eta * P_{sample} * \tau_i) / E_v,$$

149 where  $\eta$  corresponds to the spectrometer efficiency,  $P_{sample}$  to the power returned in  
150 the sample arm,  $\tau_i$  to the integration time and  $E_v$  to the energy per photon. A  
151 validation of this formula was investigated during this in vivo study. The SNR for  
152 each individual B-scan was calculated with the raw data by the ratio of the maximum  
153 intensity to the noise level. Overall, the SNR values were compared for each  
154 integration time.

## 155 **Image processing**

156 All image stacks were exported from the OCT device in normalised raw format (.vol  
157 files, image intensities normalised between 0 and 1 at a B-scan level). In the first  
158 step, all image stacks were transformed for a visual representation by multiplying all  
159 image intensities by 255 times the 4<sup>th</sup> square root of the normalised intensity. These  
160 transformed images stacks were then registered using a rigid body transformation  
161 model with a pyramid processing scheme.<sup>24</sup> This registration pipeline was adapted to  
162 reduce the effect of speckle noise in the registration process. The mean of the first  
163 10 images of the image stack was used as the reference image for the registration of

164 the complete image stack. Rigid body registration was applied to prevent distortion of  
165 the retina and to allow visualisation of the time-resolved B-scan stack. In the second  
166 step, the vessel centres of prominently visible vessels were manually annotated, and  
167 subvolumes of  $7 \times 7$  pixels around the centre were extracted from each B-scan. This  
168 subvolume corresponded to physical dimensions of  $20 \mu\text{m}$  along the B-scan axis and  
169  $27 \mu\text{m}$  along the A-scan axis.

170 In a second step, the extracted subvolumes were analysed with their original, non-  
171 normalised intensities, which were obtained from the metadata of the .vol files. The  
172 SNR in the individual vessel subvolumes were then calculated as the ratio of the  
173 average pixel intensity in the subvolume to the noise level of the B-scan, assuming  
174 shot noise limited detection. The noise level of the B-scan was approximated using  
175 the Heidelberg Quality score (in dB) and the maximum intensity value of the B-Scan.  
176 A depth-specific noise level to account for roll-off was not obtainable with the present  
177 data. An overview of the main image processing steps is shown in Figure 2.

## 178 **Flow profile generation**

179 Fringe washout is a phenomenon occurring when imaged particles are moving which  
180 leads to a SNR drop in the OCT image. The effect is linked to the integration time  
181 and is attributed to the modulation of the interference signal when particles are in  
182 motion. Typically, the fringe washout is more pronounced as the integration time  
183 increases. Yun et al. presented formulas for the fringe washout describing separately  
184 the axial and lateral components of particle movements.<sup>18</sup> In the case of oblique  
185 motion, the axial component is orders of magnitude larger when compared with the  
186 lateral component.<sup>19</sup> In this work, we used the squared sinc function presented for  
187 the axial component of the fringe washout to calculate blood flow velocity profiles<sup>18</sup>:



188  $SNR_{Drop} = \sin(k_0 \Delta z)^2 / (k_0 \Delta z)^2,$

189 where  $k_0 = 2\pi / \lambda$  and  $\Delta z = n * v * \tau$ .  $k_0$  corresponds to the central wavenumber of  
190 the light source,  $\lambda$  to the central wavelength of the light source,  $\Delta z$  to the  
191 displacement in the z-axis,  $n$  to the refractive index of the eye,  $\tau$  to the integration  
192 time, and  $v$  to the velocity.

193 This quadratic sinc function, with a known SNR drop, was solved numerically for  
194 velocity. All numerical solutions per B-scan were stored as a potential flow velocity.  
195 The results of the equation for each B-scan,  $SNR_{Drop}$ , were used to generate the  
196 dynamic flow profiles. Figure 3 presents the  $SNR_{Drop}$  profiles at the four acquisition  
197 rates with calculated velocities in mm/s for any moving object. For this study, the  
198 average SNR of the  $7 \times 7$  B-scan subvolume was divided by the maximum SNR at  
199 the pixel level of the complete vessel subvolume ( $7 \times 7 \times$  number of B-scans) to  
200 calculate the  $SNR_{Drop}$ . All calculations were made with absolute SNR values. The  
201 calculated velocities are presented in arbitrary units since the formula only takes into  
202 account the axial component and the SNR inside the vessels without flow, which  
203 would be the reference for  $SNR_{Drop}$  calculations, could not be determined.

## 204 **Data analysis**

205 The generated flow profiles were quantitatively and qualitatively analysed. On a  
206 qualitative level, the generated dynamic OCTs and the course of the pulse waves  
207 were analysed. The quantitative analysis was focused on the flow profiles, where the  
208 minimal, maximal, and average velocities for each vessel at each B-scan were  
209 calculated. The minimal velocity refers to the smallest numerical solution of the  
210  $SNR_{Drop}$  equation, the maximum velocity refers to the largest solution, and the  
211 average velocity refers to the average of all numerical solutions per B-scan.

212 Furthermore, the exam duration, the SNR of the B-scans, the mean and maximal  
213 intensity of the subvolumes, and the maximum image intensity in the raw data were  
214 analysed. Programming was performed with Linux shell scripts, Python 3.9 (Python  
215 Software Foundation, Wilmington, USA) and R V4.2.2 (Foundation for Statistical  
216 Computing, Vienna, Austria). The data were visualised with Python 3.9, R V4.2.2  
217 and 3DSlicer V4.11.<sup>25,26</sup>

## 218 **Results**

219 A total of 164 time-resolved image stacks from six healthy subjects were acquired  
220 and manually annotated. All acquisitions were performed in the right eyes of the  
221 patients. The image stacks consisted of 47 to 483 B-scans, and between 1 and 5  
222 vessels were annotated per volume. In summary, 466 vessels were annotated in the  
223 time-series data, totalling 94,619 annotated vessel centres.

## 224 **Qualitative analysis**

225 Time-resolved dynamic acquisitions of structural OCT are feasible in healthy  
226 subjects and show changes in reconstructed images over time. These changes are  
227 of different nature, where pulsatile profiles can be clearly identified. Supplementary  
228 Video 1 shows the pulsation inside an artery at the centre of the optic nerve as  
229 changes in image intensity. Furthermore, we can see pulsation of the optic nerve  
230 head tissue. Supplementary Video 2 shows a longitudinal cut through the same  
231 artery, where we can observe the fringe washout along the vessel. We detected an  
232 increase in the fringe washout at the centre of the vessel, showing a higher relative  
233 flow velocity. In addition, we identified a bimodal peak of the fringe washout.

234 Qualitative analysis of the generated flow profiles confirmed this pulsatility for the  
235 SNR changes and the calculated flow velocities. As depicted for an acquisition at the  
236 optic nerve head centre in Figure 4, the flow profiles show pulsatility where maximal  
237 and minimal velocities were clearly distinguishable. In addition, the flow velocities  
238 showed a rapid increase, followed by a gradual decrease towards a steady-state  
239 until the pulsatile cycle restarted. As shown in Figure 5, this flow profile could be  
240 visualised at all four acquisition rates, with a constant repetition of approximately four  
241 pulse visualisations within 3 s. These observations suggest that the pulsation

242 propagates in correspondence with the cardiac cycle, which corresponds in this  
243 example to a heart rate of 80 beats per minute.

244 When analysing the blood flow profiles at different eccentricities, pulsatility was  
245 evident close to the optic nerve centre. The pulsatility decreased towards the  
246 periphery, where a distinct change tended to occur when the vessel crossed the  
247 optic nerve head rim. Figure 6 provides a visual representation of this finding by  
248 showing the calculated blood flow profiles along with an en-face representation of  
249 their acquisition location. Further, we observed a decrease of the estimated average  
250 flow velocity towards the periphery, here again with an apparent decrease at the  
251 crossing of the vessel of the optic nerve head rim.

## 252 **Quantitative analysis**

253 We validated whether the SNR variability inside the vessels was different from the  
254 SNR variability in adjacent tissue, as the fringe washout variability could occur due to  
255 axial bulk motion. For this analysis, we annotated further retinal nerve fibre layer  
256 (RNFL) subvolumes in the proximity of an artery as the RNFL is known to have a  
257 high reflectivity in OCT.<sup>27</sup> We analysed the SNR in the vessel ( $SNR_{\text{vessel}}$ ), the SNR in  
258 the RNFL ( $SNR_{\text{RNFL}}$ ) and the SNR in the complete B-scan ( $SNR_{\text{B-scan}}$ ). The analysis  
259 confirmed that the  $SNR_{\text{vessel}}$  was lower than the  $SNR_{\text{RNFL}}$ . The  $SNR_{\text{B-scan}}$  was the  
260 highest as it was defined by the peak SNR in the complete image. The  $SNR_{\text{vessel}} /$   
261  $SNR_{\text{B-scan}}$  ratio vessel clearly decreased with longer integration times while the  
262  $SNR_{\text{RNFL}} / SNR_{\text{B-scan}}$  ratio showed less variability. This showed that the fringe  
263 washout inside the vessels was stronger at longer integration times. The SNR  
264 comparison of the artery and the RNFL are further described for the different  
265 integration times in Table 1. A visualisation of the fringe washout at the different

266 integration times can be found in the Supplementary Video 3, where the SNR drops  
267 diminish with faster acquisitions.

268 An overview of the statistics and the calculated velocities per A-scan rate can be  
269 found in Tables 2 and 3. When analysing the absolute SNRs,  $SNR_{B\text{-scan}}$  and  
270  $SNR_{Vessel}$  correlated with integration time. The calculated factors of the integration  
271 times of 44.8  $\mu\text{s}$  at a nominal A-scan rate of 20 kHz, 22.4  $\mu\text{s}$  at 40 kHz 11.2  $\mu\text{s}$  at 85  
272 kHz, 7.24  $\mu\text{s}$  at 125 kHz are 6.19, 3.09, and 1.55 to 1 when taking the shortest  
273 integration time as a reference. Median  $SNR_{B\text{-scan}}$  factors are 5.83, 3.73, and 1.75 to  
274 1, respectively. In summary, a longer integration time led to an increase of both  
275 absolute  $SNR_{Vessel}$  and  $SNR_{B\text{-scan}}$ , and a decrease of the  $SNR_{Vessel} / SNR_{B\text{-scan}}$  ratio.  
276 This is also shown in the  $SNR_{Subvolume} / SNR_{B\text{-scan}}$  for the arteries in Table 1.

277 The  $SNR_{Vessel} / \text{Peak } SNR_{Vessel}$  ratio corresponds to the SNR drop with which the flow  
278 velocities were calculated. This ratio remained constant across the varying  
279 integration times. Given that Yun et al.'s model for flow velocities is dependent on  
280 the integration time, the calculated flow velocities showed a linear relationship with  
281 their integration time ratio.<sup>18</sup> In the analysis of the flow velocities at different  
282 distances from the optic nerve head of the complete cohort, decreasing calculated  
283 mean flow velocity along the vessel arch were observed. A summary overview of the  
284 flow velocities along the vessel arch is shown in Figure 7, with corresponding  
285 examples of SLOs.

## 286 Discussion

287 To analyse the dynamics within retinal structures and, more specifically, in vessels,  
288 we developed acquisition protocols for dynamic time-resolved OCT measurements  
289 utilising a commercially available OCT device widely used in clinics. Taking  
290 advantage of the fringe washout phenomenon of spectral-domain OCTs, we  
291 calculated time-resolved velocity profiles based on the SNR drop within the vessels.  
292 In addition, we found pulsatile blood flow profiles, where the amplitude and average  
293 velocity decreased from the centre of the optic nerve head towards the retinal  
294 periphery.

295 This study presents several novel possibilities for the analysis of OCT data acquired  
296 with a commercially available device. First, time-resolved dynamic OCT with a  
297 matching of B-scans to a time axis allowed us to assess structural changes with an  
298 interval of as low as 9 ms between B-scans. The matching of the B-scans to a time  
299 axis allowed for generating videos with real interframe intervals (Supplementary  
300 Videos 1 and 2). Considering that inter-B-scan intervals differ when tracking is  
301 activated and individual B-scans are averaged, continuous visualisations of B-scans  
302 can create an incorrect impression of the speed at which changes happen.

303 Second, this study presents methods for comparing OCT acquisitions with different  
304 integration times. As OCT phenomena, such as the fringe washout, are affected by  
305 the integration time, it is important to consider parameters such as the image quality  
306 or the OCT intensity, which vary with different integration times.<sup>18,28</sup> In this study, we  
307 showed in vivo that the fringe washout phenomenon varies for different integration  
308 times. The fringe washout in vessels was stronger at longer integration times, which  
309 should be considered in further studies.

310 Third, we combined this knowledge to investigate and visualise pulsatile dynamics  
311 within vessels in structural OCT. For this, we took advantage of the fact that the  
312 fringe washout analysis allows for the calculation of corresponding flow velocities.  
313 We generated blood flow profiles by calculating the flow velocity of the axial motion  
314 component for each time-resolved B-scan. OCT is primarily utilised for visualising  
315 retinal tissue, but it provides several advantages over OCTA in certain scenarios. In  
316 particular, structural OCT allows to directly work with the raw intensities from the  
317 acquisition as opposed to post-processed images. As a result, OCT can also be  
318 advantageous for the analysis of vessels, as it provides direct information about the  
319 characteristics of the tissue being imaged.

320 The analysis of the fringe washout would generally allow the calculation of velocities  
321 in mm/s. However, there are several limitations to quantitative values that we could  
322 not address in this work. The fringe washout is composed of axial and lateral  
323 components. Weighing both components is possible if the angle of the vessel and  
324 sample motion is known.<sup>29</sup> However, the axial component is larger by orders of  
325 magnitude compared with the lateral component in the case of oblique motion.<sup>19</sup> A  
326 further limitation that must be addressed is the reference intensity to calculate the  
327 SNR drop, which cannot be determined in a moving system. The optical properties of  
328 the eye, such as the clarity of the optical media as the lens, the cornea or even the  
329 momentaneous tear film affect the SNR.<sup>30</sup> Furthermore, the peak SNR inside a  
330 vessel is also affected by fringe washout, as there is permanent motion in a larger  
331 vessel in vivo. Hence, an absolute reference value or an external calibration seems  
332 difficult to determine, even under ideal circumstances. Further, the sensitivity roll-off  
333 along the A-scan axis was not assessed and hence not included in the noise  
334 calculations. An analysis of the transformation matrices used in the registration

335 process could assist in calculating the fringe washout component caused by bulk eye  
336 motion. In this work, we focused on the analysis of the axial component of the fringe  
337 washout to calculate potential blood flow velocities and estimate relative flow profiles  
338 in vivo. For this, we calculated numerical solutions to the  $SNR_{Drop}$  equation  
339 representing potential axial flow velocities. We present estimated flow velocity  
340 profiles in arbitrary units as an average of all the numerical solutions per B-Scan. It's  
341 important to note that these velocity profiles are estimates as there are multiple  
342 numerical solutions to the  $SNR_{Drop}$  equation. Potentially, for certain B-scans a lower  
343 numerical solution could represent the real velocity, while for others with the same  
344  $SNR_{Drop}$  a higher numerical solution would be correct. To determine which numerical  
345 solutions to the equation accurately reflect the true axial flow velocity values, further  
346 validation of the technique is required.

347 An objective reference value could help align the different flow velocities we found at  
348 different acquisition rates by using the formula by Yun et al.<sup>18</sup> The calculated  
349 average, minimum and maximum flow velocities seem to be inversely dependent on  
350 the integration time as shown in Table 3. Further, we found that the absolute SNR in  
351 the vessels increases with increasing integration time, however, that the relative  
352 SNR drop within the vessels remained constant across the integration times. The  
353 major advantage of this finding is that blood flow profiles can be estimated and  
354 visualised independently from the integration time, even at higher acquisition rates  
355 where there is less relative fringe washout.

356 The decreasing velocity of the flow profiles along the vessel arch suggest that the  
357 method can grasp decreasing velocities in accordance with known physiologic  
358 principles. However, this cannot yet be supported by our data as the angle between  
359 the beam and the flow direction varies across the retina. Such changes in the angle



360 also affect the axial velocity component. In accordance with this, we noticed that the  
361 pulsatility of the calculated blood flow profiles tends to decrease when an artery  
362 crosses the optic nerve head rim. For a precise measurement of the flow velocity,  
363 again the lateral component or the angle of the vessel would have to be known.<sup>29</sup>  
364 Other techniques to measure retinal blood flow exist, such as Doppler OCT, laser  
365 speckle flowgraphy and VISTA in OCTA.<sup>5,6,8,31</sup> The analysis of retinal blood flow  
366 based on intensity changes has also been presented for a neural network-based  
367 approach.<sup>32</sup> However, these technologies are mainly used in research environments  
368 and are not yet regularly in clinical practice as the required phase information or A-  
369 scan acquisition rates are not widely available. Our method allows to calculate retinal  
370 blood flow velocity profiles with a widely used clinical device while at the same time  
371 contributing to bridge the gap left by other measurement techniques. Techniques  
372 such as laser Doppler flowmetry can only be used if the Doppler angle is known;  
373 laser speckle flowgraphy does not allow for a depth-resolved flow measurement; and  
374 VISTA is an extension of OCTA that has been presented for the macular area  
375 only.<sup>8,31</sup> This could be mainly due to the fact that the line rates of the lasers are  
376 currently not high enough to measure changes in the saturation of signal changes for  
377 VISTA outside the macular area. With further validation, our method could allow the  
378 visualisation of depth- and time-resolved flow profiles, as shown in this study for  
379 vessels around the optic nerve head. Ideally, our method could be further enhanced  
380 by including Doppler angle and phase shift information to translate combined  
381 findings into clinical practice.<sup>5,10,19</sup> A validation of newly obtained blood flow profile  
382 values could be achieved by comparing them with measurements from flow  
383 phantoms.<sup>19</sup>

384 To analyse retinal blood flow is relevant as the vasculature is involved in many  
385 ocular diseases, such as diabetic retinopathy and glaucoma. Blood flow  
386 disturbances, such as haemorrhage or ischemic attacks, can lead to vision loss and  
387 identifying vessels at risk could help prevent vascular injuries. For accurate and  
388 easy-to-use measurements, blood flow measurements must be implemented in  
389 clinics. We aim to contribute to this goal with the proposed time-resolved structural  
390 OCT-generated flow profiles. Thus far, our method has only been tested in healthy  
391 participants and not yet in subjects with ocular diseases. The short-term  
392 reproducibility for the generation of flow profiles at the same location was good. Very  
393 similar flow profiles could be generated during acquisitions with different integration  
394 times at the same location. Short-term reproducibility at the same location with the  
395 same integration time as well as inter-visit reproducibility and variability still need to  
396 be determined. The method could be further validated by imaging subjects with  
397 diseases such as glaucoma or diabetic retinopathy, as their blood flow has been  
398 shown to be altered with other measuring techniques.<sup>33–35</sup> The new estimates of  
399 retinal blood flow profiles could also be compared against the previously described  
400 techniques in further studies.

401 Future work will include a deeper analysis of the pulsatile flow profiles. As shown in  
402 Figures 4 and 5 and Supplementary Videos 2 and 3, the pulse wave appeared to  
403 have a bimodal peak, which would be congruent with the propagation of the aortic  
404 pulse wave.<sup>36</sup> In addition, the pulse wave analysis, in combination with absolute  
405 velocity and flow information, could also be used to analyse the retinal blood flow  
406 volume and parts of the cardiac output arriving at the eye from the heart.<sup>10,37</sup> An  
407 extension of this could also include the investigation of the best acquisition location,  
408 differences across branching points and general differences between arteries and

409 veins. The current measurements are consecutive B-scan acquisitions over time,  
410 with a minimal inter-B-scan interval of ~9 ms at 1024 A-scans. With fast acquisition  
411 speeds and a small number of B-scans, 4D cross-sectional acquisitions can become  
412 feasible. Hereby, the pulsatile nature of the fringe washout indicates a correlation  
413 with the cardiac cycle and a representation of the pulse propagation in the  
414 vasculature of the optic nerve head. In vivo measurements could investigate the  
415 validity of models about the pulse propagation towards the eye.<sup>38</sup>

416

## 417 **Conclusions**

418 In summary, this study showed that time-resolved OCT acquisitions are feasible in  
419 vivo and that continuous acquisitions over several seconds can be made with a  
420 widely used clinical device. We showed that dynamic blood flow profiles can be  
421 calculated from time-resolved OCT acquisitions. Time-resolved dynamic OCT, with  
422 its high spatial and temporal resolution, holds promising information that can be  
423 further investigated as a novel clinically applicable parameter for the assessment of  
424 retinal blood flow velocity profiles.

425

## 426 **Acknowledgements**

427 The authors wish to thank the Swiss National Science Foundation, the Janggen-  
428 Pöhn-Stiftung and the AlumniMedizin Basel for their financial support of this project.

429 In addition, the researchers would like to thank all the participants who volunteered  
430 for this study.

## 431 References

- 432 1. Huang D, Swanson EA, Lin CP, Schuman JS, Stinson WG, Chang W, Hee MR, Flotte  
433 T, Gregory K, Puliafito CA, Fujimoto JG. Optical coherence tomography. *Science*.  
434 1991;254(5035):1178-1181. doi:10.1126/science.1957169
- 435 2. Chinn SR, Swanson EA, Fujimoto JG. Optical coherence tomography using a  
436 frequency-tunable optical source. *Opt Lett*. 1997;22(5):340. doi:10.1364/ol.22.000340
- 437 3. Fujimoto J, Swanson E. The development, commercialization, and impact of optical  
438 coherence tomography. *Investig Ophthalmol Vis Sci*. 2016;57(9):OCT1-OCT13.  
439 doi:10.1167/iovs.16-19963
- 440 4. Spaide RF, Fujimoto JG, Waheed NK, Sadda SR, Staurengi G. Optical coherence  
441 tomography angiography. *Prog Retin Eye Res*. 2018;64:1-55.  
442 doi:10.1016/j.preteyeres.2017.11.003
- 443 5. Leitgeb RA, Werkmeister RM, Blatter C, Schmetterer L. Doppler Optical Coherence  
444 Tomography. *Prog Retin Eye Res*. 2014;41:26-43.  
445 doi:10.1016/j.preteyeres.2014.03.004
- 446 6. Sugiyama T. Basic technology and clinical applications of the updated model of laser  
447 speckle flowgraphy to ocular diseases. *Photonics*. 2014;1(3):220-234.  
448 doi:10.3390/photonics1030220
- 449 7. Wang L, Jiang H, Grinvald A, Jayadev C, Wang J. A Mini Review of Clinical and  
450 Research Applications of the Retinal Function Imager. *Curr Eye Res*. 2018;43(3):273-  
451 288. doi:10.1080/02713683.2017.1414853
- 452 8. Ploner SB, Moulton EM, Choi W, Waheed NK, Lee B, Novais EA, Cole ED, Potsaid B,  
453 Husvogt L, Schottenhamml J, Maier A, Rosenfeld PJ, Duker JS, Hornegger J,  
454 Fujimoto JG. Toward quantitative optical coherence tomography angiography:  
455 Visualizing blood flow speeds in ocular: Pathology using variable interscan time  
456 analysis. In: *Retina*. Vol 36. NIH Public Access; 2016:S118-S126.  
457 doi:10.1097/IAE.0000000000001328
- 458 9. White BR, Nassif N, Boer JF de, Cense B, Bouma BE, Park BH, Chen TC, Tearney  
459 GJ, Pierce MC. In vivo dynamic human retinal blood flow imaging using ultra-high-  
460 speed spectral domain optical Doppler tomography. *Opt Express*, Vol 11, Issue 25, pp  
461 3490-3497. 2003;11(25):3490-3497. doi:10.1364/OE.11.003490
- 462 10. Baumann B, Potsaid B, Kraus MF, Liu JJ, Huang D, Hornegger J, Cable AE, Duker  
463 JS, Fujimoto JG, Flammer J, Orgül S, Costa VP, Orzalesi N, Kriegelstein GK, Serra  
464 LM, Renard JP, Stefánsson E, Huang D, Swanson EA, Lin CP, Schuman JS, Stinson  
465 WG, Chang W, Hee MR, Flotte T, Gregory K, Puliafito CA, Fujimoto JG. Total retinal  
466 blood flow measurement with ultrahigh speed swept source/Fourier domain OCT.  
467 *Biomed Opt Express*, Vol 2, Issue 6, pp 1539-1552. 2011;2(6):1539-1552.  
468 doi:10.1364/BOE.2.001539
- 469 11. Werkmeister RM, Dragostinoff N, Palkovits S, Told R, Boltz A, Leitgeb RA, Gröschl M,  
470 Garhöfer G, Schmetterer L. Measurement of Absolute Blood Flow Velocity and Blood  
471 Flow in the Human Retina by Dual-Beam Bidirectional Doppler Fourier-Domain  
472 Optical Coherence Tomography. *Invest Ophthalmol Vis Sci*. 2012;53(10):6062-6071.  
473 doi:10.1167/IOVS.12-9514
- 474 12. Wartak A, Beer F, Desissaire S, Baumann B, Pircher M, Hitzemberger CK.  
475 Investigating spontaneous retinal venous pulsation using Doppler optical coherence  
476 tomography. *Sci Reports* 2019 91. 2019;9(1):1-11. doi:10.1038/s41598-019-40961-4

- 477 13. Arya M, Rashad R, Sorour O, Moulton EM, Fujimoto JG, Waheed NK. Optical  
478 Coherence Tomography Angiography (OCTA) Flow Speed Mapping Technology for  
479 Retinal Diseases. *Expert Rev Med Devices*. 2018;15(12):875.  
480 doi:10.1080/17434440.2018.1548932
- 481 14. Maloca PM, Feu-Basilio S, Schottenhamml J, Valmaggia P, Scholl HPN, Rosinés-  
482 Fonoll J, Marin-Martinez S, Inglin N, Reich M, Lange C, Egan C, Zweifel S, Tufail A,  
483 Spaide RF, Zarranz-Ventura J. Reference database of total retinal vessel surface  
484 area derived from volume-rendered optical coherence tomography angiography. *Sci*  
485 *Rep*. 2022;12(1). doi:10.1038/s41598-022-07439-2
- 486 15. Schmitt JM. Optical Coherence Tomography (OCT): a review. *IEEE J Sel Top*  
487 *Quantum Electron*. 1999;5(4):1205-1215. doi:10.1109/2944.796348
- 488 16. Aumann S, Donner S, Fischer J, Müller F. Optical Coherence Tomography (OCT):  
489 Principle and Technical Realization. In: *High Resolution Imaging in Microscopy and*  
490 *Ophthalmology*. Springer; 2019:59-85. doi:10.1007/978-3-030-16638-0\_3
- 491 17. Yaqoob Z, Wu J, Yang C. Spectral domain optical coherence tomography: a better  
492 OCT imaging strategy. *Biotechniques*. 2005;39(6 Suppl). doi:10.2144/000112090
- 493 18. Yun SH, Tearney GJ, de Boer JF, Bouma BE. Motion artifacts in optical coherence  
494 tomography with frequency-domain ranging. *Opt Express*. 2004;12(13):2977.  
495 doi:10.1364/opex.12.002977
- 496 19. Walther J, Mueller G, Morawietz H, Koch E. Signal power decrease due to fringe  
497 washout as an extension of the limited Doppler flow measurement range in spectral  
498 domain optical coherence tomography. *J Biomed Opt*. 2010;15(4):041511.  
499 doi:10.1117/1.3466578
- 500 20. Szkulmowski M, Wojtkowski M, Huang D, Swanson EA, Lin CP, Schuman JS, Stinson  
501 WG, Chang W, Hee MR, Flotte T, Gregory K, Puliafito CA, Fujimoto JG, Szkulmowski  
502 M, Gorczynska I, Bukowska D, Wojtkowski M, Targowski P. Averaging techniques for  
503 OCT imaging. *Opt Express, Vol 21, Issue 8, pp 9757-9773*. 2013;21(8):9757-9773.  
504 doi:10.1364/OE.21.009757
- 505 21. Spaide RF, Valmaggia P, Maloca PM, Scholl HPN, Otto TP, Caujolle S. Imaging the  
506 vitreous with a novel boosted optical coherence tomography technique: Vitreous  
507 degeneration and cisterns. *Retina*. 2022;42(8):1433-1441.  
508 doi:10.1097/IAE.0000000000003474
- 509 22. De Boer JF, Leitgeb R, Wojtkowski M, Huang D, Swanson EA, Lin CP, Schuman JS,  
510 Stinson WG, Chang W, Hee MR, Flotte T, Gregory K, Puliafito CA, Fujimoto JG.  
511 Twenty-five years of optical coherence tomography: the paradigm shift in sensitivity  
512 and speed provided by Fourier domain OCT [Invited]. *Biomed Opt Express, Vol 8,*  
513 *Issue 7, pp 3248-3280*. 2017;8(7):3248-3280. doi:10.1364/BOE.8.003248
- 514 23. Choma MA, Sarunic M V., Izatt JA, Yang C. Sensitivity advantage of swept source  
515 and Fourier domain optical coherence tomography. *Opt Express, Vol 11, Issue 18, pp*  
516 *2183-2189*. 2003;11(18):2183-2189. doi:10.1364/OE.11.002183
- 517 24. Thévenaz P, Ruttimann UE, Unser M. A pyramid approach to subpixel registration  
518 based on intensity. *IEEE Trans Image Process*. 1998;7(1):27-41.  
519 doi:10.1109/83.650848
- 520 25. Sjoberg DD, Whiting K, Curry M, Lavery JA, Larmarange J. Reproducible Summary  
521 Tables with the gtsummary Package. *R J*. 2021;13(1):570-580. doi:10.32614/rj-2021-  
522 053

- 523 26. Fedorov A, Beichel R, Kalpathy-Cramer J, Finet J, Fillion-Robin JC, Pujol S, Bauer C,  
524 Jennings D, Fennessy F, Sonka M, Buatti J, Aylward S, Miller J V., Pieper S, Kikinis  
525 R. 3D Slicer as an image computing platform for the Quantitative Imaging Network.  
526 *Magn Reson Imaging*. 2012;30(9):1323-1341. doi:10.1016/j.mri.2012.05.001
- 527 27. Jørgensen TM, Thomadsen J, Christensen U, Soliman W, Sander B. Enhancing the  
528 signal-to-noise ratio in ophthalmic optical coherence tomography by image  
529 registration—method and clinical examples. *J Biomed Opt*. 2007;12(4):041208.  
530 doi:10.1117/1.2772879
- 531 28. Spaide RF, Valmaggia P, Maloca PM. IMAGING the VITREOUS with A NOVEL  
532 BOOSTED OPTICAL COHERENCE TOMOGRAPHY TECHNIQUE: Posterior  
533 Vitreous Detachment. *Retina*. 2022;42(8):1425-1432.  
534 doi:10.1097/IAE.0000000000003500
- 535 29. Walther J, Koch E. Flow measurement by using the signal decrease of moving  
536 scatterers in spatially encoded Fourier domain optical coherence tomography. In:  
537 *Optical Coherence Tomography and Coherence Domain Optical Methods in*  
538 *Biomedicine XIII*. Vol 7168. SPIE; 2009:71681S. doi:10.1117/12.808737
- 539 30. Van Velthoven MEJ, Van Der Linden MH, De Smet MD, Faber DJ. Influence of  
540 cataract on optical coherence tomography image quality and retinal thickness. *Br J*  
541 *Ophthalmol*. 2006;90:1259-1262. doi:10.1136/bjo.2004.097022
- 542 31. Choi W, Moulton EM, Waheed NK, Adhi M, Lee B, Lu CD, De Carlo TE, Jayaraman V,  
543 Rosenfeld PJ, Duker JS, Fujimoto JG. Ultrahigh Speed Swept Source OCT  
544 Angiography in Non-Exudative Age-Related Macular Degeneration with Geographic  
545 Atrophy. *Ophthalmology*. 2015;122(12):2532. doi:10.1016/J.OPHTHA.2015.08.029
- 546 32. Braaf B, Donner S, Uribe-Patarroyo N, Bouma BE, Vakoc BJ. A Neural Network  
547 Approach to Quantify Blood Flow from Retinal OCT Intensity Time-Series  
548 Measurements. *Sci Rep*. 2020;10(1). doi:10.1038/s41598-020-66158-8
- 549 33. Grieshaber MC, Flammer J. Blood flow in glaucoma. *Curr Opin Ophthalmol*.  
550 2005;16(2):79-83. doi:10.1097/01.icu.0000156134.38495.0b
- 551 34. Flammer J, Orgül S, Costa VP, Orzalesi N, Kriegelstein GK, Serra LM, Renard JP,  
552 Stefánsson E. The impact of ocular blood flow in glaucoma. *Prog Retin Eye Res*.  
553 2002;21(4):359-393. doi:10.1016/S1350-9462(02)00008-3
- 554 35. Schmetterer L, Wolzt M. Ocular blood flow and associated functional deviations in  
555 diabetic retinopathy. *Diabetologia*. 1999;42(4):387-405. doi:10.1007/s001250051171
- 556 36. Gurovich AN, Braith RW. Pulse wave analysis and pulse wave velocity techniques:  
557 Are they ready for the clinic. *Hypertens Res*. 2011;34(2):166-169.  
558 doi:10.1038/hr.2010.217
- 559 37. Levy JH, Kouz K, Scheeren TWL, De Backer D, Saugel B. ClinicaL FoCUS Review  
560 Pulse Wave Analysis to Estimate Cardiac Output. *Anesthesiology*. 2021;134:119-145.  
561 doi:10.1097/ALN.0000000000003553
- 562 38. Jin Y, Wang X, Irnadiastputri SFR, Mohan RE, Aung T, Perera SA, Boote C, Jonas  
563 JB, Schmetterer L, Girard MJA. Effect of changing heart rate on the ocular pulse and  
564 dynamic biomechanical behavior of the optic nerve head. *Investig Ophthalmol Vis Sci*.  
565 2020;61(4):27-27. doi:10.1167/iovs.61.4.27

566

567



568 **Tables**

569 **Table 1.** Vessel–RNFL comparison of SNR

570

| <b>Variable</b>                                                   | <b>20 kHz, N = 78</b>   | <b>40 kHz, N = 132</b>    | <b>85 kHz, N = 228</b>     | <b>125 kHz, N = 351</b>    |
|-------------------------------------------------------------------|-------------------------|---------------------------|----------------------------|----------------------------|
| <b>SNR<sub>B-scan</sub> [dB]</b>                                  | 39.7 (38.9, 40.6)       | 37.8 (37.3, 38.5)         | 36.0 (35.0, 36.9)          | 32.6 (31.7, 33.8)          |
| <b>SNR<sub>Subvolume</sub> [dB]</b>                               |                         |                           |                            |                            |
| Artery                                                            | 6.8 (2.6, 8.7)          | 5.3 (2.1, 8.5)            | 11.8 (6.2, 15.4)           | 12.7 (10.0, 15.2)          |
| RNFL                                                              | 33.7 (32.4, 34.6)       | 32.2 (31.1, 33.4)         | 30.7 (29.7, 31.6)          | 28.7 (27.4, 29.6)          |
| <b>Noise Level [RAW value]</b>                                    | 55,186 (51,028, 61,463) | 110,620 (94,717, 124,661) | 202,044 (179,693, 228,765) | 146,278 (129,426, 165,785) |
| <b>SNR<sub>Subvolume</sub> / Peak SNR<sub>Subvolume</sub> [%]</b> |                         |                           |                            |                            |
| Artery                                                            | 4.68 (1.89, 7.09)       | 2.76 (1.32, 5.79)         | 1.40 (0.39, 3.27)          | 2.23 (1.19, 3.96)          |
| RNFL                                                              | 14.2 (10.7, 17.6)       | 17.3 (13.3, 22.3)         | 13.8 (10.9, 17.0)          | 13.9 (10.5, 17.0)          |
| <b>SNR<sub>Subvolume</sub> / SNR<sub>B-scan</sub> [%]</b>         |                         |                           |                            |                            |
| Artery                                                            | 0.05 (0.02, 0.07)       | 0.06 (0.03, 0.11)         | 0.38 (0.13, 0.73)          | 1.10 (0.58, 1.64)          |
| RNFL                                                              | 24 (16, 30)             | 27 (22, 34)               | 28 (24, 33)                | 42 (31, 48)                |

Results are presented as median (IQR)

571 RNFL: retinal nerve fibre layer, N: number of B-scans with matched vessel-RNFL annotations, SNR: signal-to-  
 572 noise ratio, SNR<sub>B-scan</sub>: SNR in the complete B-scan, SNR<sub>Subvolume</sub>: SNR in the B-scan subvolume, RAW value:  
 573 value extracted from the raw .vol OCT files, Peak SNR<sub>Subvolume</sub>: maximal SNR on a pixel level in the complete  
 574 subvolume over time, IQR: interquartile range.

575 **Table 2.** Acquisition overview per nominal A-scan rate

|                                              | 20 kHz, N = 109                          | 40 kHz, N = 113                          | 85 kHz, N = 122                        | 125 kHz, N = 122                       |
|----------------------------------------------|------------------------------------------|------------------------------------------|----------------------------------------|----------------------------------------|
| <b>B-scan Interval [ms]</b>                  | 49 (49, 49)                              | 25 (25, 25)                              | 13 (13, 13)                            | 9 (9, 9)                               |
| <b>Exam Duration [ms]</b>                    | 4,224 (3,528, 5,317)                     | 4,042 (3,582, 4,376)                     | 3,411 (2,950, 3,759)                   | 2,867 (2,059, 3,321)                   |
| <b>Annotated B-scans per Image Stack [n]</b> | 86 (72, 108)                             | 159 (141, 172)                           | 253 (219, 279)                         | 303 (218, 351)                         |
| <b>SNR<sub>B-scan</sub> [dB]</b>             | 39.8 (37.3, 42.4)                        | 38.0 (35.3, 39.6)                        | 34.6 (31.0, 36.0)                      | 32.2 (29.9, 34.4)                      |
| <b>Peak B-scan Intensity [RAW value]</b>     | 555,997,151 (340,536,329, 1,034,710,323) | 786,543,813 (345,832,675, 1,310,379,806) | 685,001,499 (347,938,689, 963,279,206) | 239,018,674 (168,368,268, 488,855,979) |
| <b>Annotated Image Stacks [N]</b>            |                                          |                                          |                                        |                                        |
| Optic nerve head centre                      | 9 (8.3%)                                 | 13 (12%)                                 | 13 (11%)                               | 13 (11%)                               |
| NRM                                          | 38 (35%)                                 | 31 (27%)                                 | 42 (34%)                               | 42 (34%)                               |
| 1 ODD from NRM                               | 16 (15%)                                 | 17 (15%)                                 | 17 (14%)                               | 17 (14%)                               |
| 2 ODDs from NRM                              | 14 (13%)                                 | 19 (17%)                                 | 17 (14%)                               | 17 (14%)                               |
| 3 ODDs from NRM                              | 17 (16%)                                 | 17 (15%)                                 | 17 (14%)                               | 17 (14%)                               |
| 4 ODDs from NRM                              | 12 (11%)                                 | 13 (12%)                                 | 13 (11%)                               | 13 (11%)                               |
| 5 ODDs from NRM                              | 3 (2.8%)                                 | 3 (2.7%)                                 | 3 (2.5%)                               | 3 (2.5%)                               |

Results are presented as median (IQR) of the average values per image stack | N (% of image stacks per acquisition rate)

576 N: number of time-resolved image stacks, SNR<sub>B-scan</sub>: signal-to-noise ratio in the complete B-scan; RAW value:

577 value extracted from the raw .vol OCT files; NRM: Neuroretinal rim, 1 ODD from NRM: eccentricity of 1 optic disc

578 diameter from the neuroretinal rim, IQR: interquartile range.



579 **Table 3.** Vessel subvolume SNRs and calculated velocities

580

| Variable                                                    | 20 kHz, N = 109                    | 40 kHz, N = 113                     | 85 kHz, N = 122                     | 125 kHz, N = 122                   |
|-------------------------------------------------------------|------------------------------------|-------------------------------------|-------------------------------------|------------------------------------|
| <b>SNR<sub>Vessel</sub> [unitless]</b>                      | 400 (134, 995)                     | 328 (151, 610)                      | 159 (75, 312)                       | 105 (50, 201)                      |
| <b>Vessel Intensity [RAW value]</b>                         | 25,043,042 (7,035,096, 62,483,917) | 42,599,201 (17,286,374, 73,869,286) | 36,436,880 (16,508,790, 69,969,934) | 15,610,795 (7,235,353, 30,854,052) |
| <b>SNR<sub>Vessel</sub> / Peak SNR<sub>Vessel</sub> [%]</b> | 5.7 (4.6, 6.9)                     | 5.4 (3.8, 6.9)                      | 5.3 (3.8, 7.0)                      | 5.0 (3.9, 6.6)                     |
| <b>Average Velocity [a.u.]</b>                              | 7 (6, 8)                           | 14 (12, 16)                         | 29 (26, 33)                         | 43 (38, 48)                        |
| <b>Minimal Velocity [a.u.]</b>                              | 5 (5, 5)                           | 11 (10, 11)                         | 22 (22, 23)                         | 33 (32, 34)                        |
| <b>Maximal Velocity [a.u.]</b>                              | 8 (7, 10)                          | 17 (14, 21)                         | 35 (29, 44)                         | 53 (43, 62)                        |

Results are presented as median (IQR) of the average values per image stack

581 N: number of time-resolved image stacks, SNR: signal-to-noise ratio, SNR<sub>Vessel</sub>: Average SNR in the vessel  
582 subvolumes of the B-Scan, RAW value: value extracted from the raw .vol OCT files, Peak SNR<sub>Vessel</sub>: maximal  
583 SNR on a pixel level in the complete vessel subvolume over time, Average Velocity: average of the numerical  
584 solutions to the SNR<sub>Drop</sub> equation per B-scan, Minimal Velocity: smallest numerical solution, Maximal Velocity:  
585 largest numerical solution, a.u.: arbitrary unit, IQR: interquartile range.

586 **Figures**

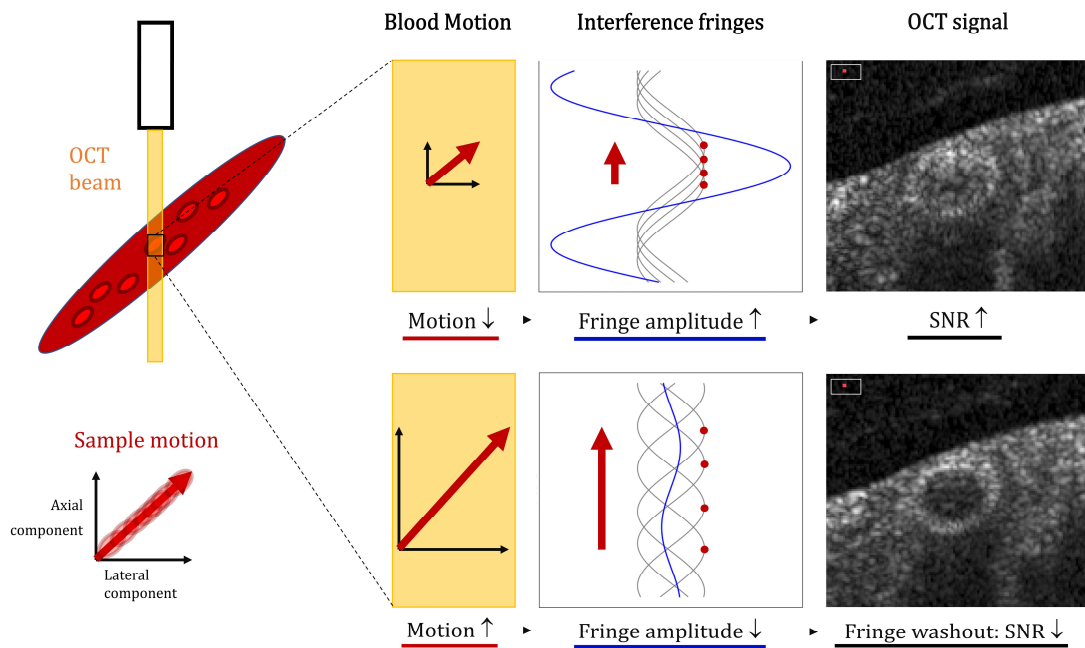

587

588 **Figure 1.** Illustration of the fringe washout in spectral-domain optical coherence tomography (OCT). Fringe  
589 washout describes the signal drop in the OCT when the sample moves through the sample beam during  
590 illumination. The sample motion can be split into two components: a lateral component and an axial component.  
591 When the integration time is shorter or the velocity is smaller, there is less motion, the fringe amplitude is higher  
592 and, hence, the OCT intensity is higher. When the integration time is longer or the velocity is higher, the sample  
593 has a larger motion, which leads to a lower fringe amplitude. This fringe washout causes a higher SNR drop and  
594 a lower OCT intensity (bottom right).

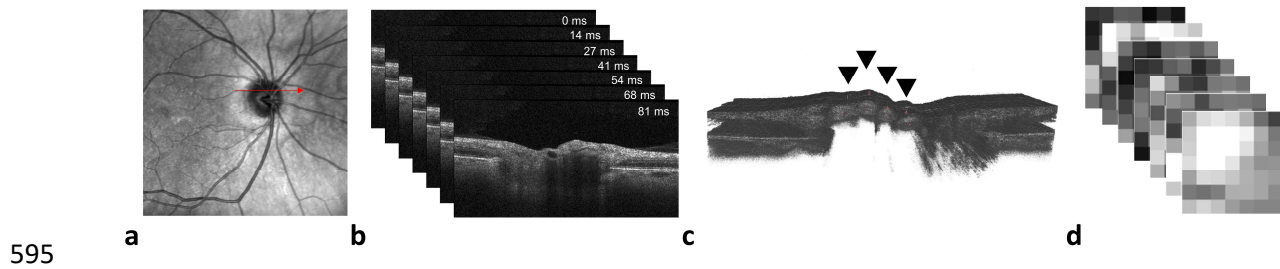

596 **Figure 2.** Time-resolved dynamic optical coherence tomography-based extraction of vessel subvolumes. **a**  
597 Scanning laser ophthalmoscopy (SLO) image. The red arrow indicates the position of the continuous  
598 acquisitions, which can be started by a press on the joystick. **b** The time-resolved B-scans are continuously  
599 acquired with a time stamp for each B-scan. **c** The continuous images are registered and reconstructed as a  
600 three-dimensional volume, where the third dimension represents the time axis. On each B-scan, the vessel  
601 centres were manually annotated. **d** Subvolumes of  $7 \times 7$  pixels surrounding the vessel centre were extracted  
602 and further processed for fringe washout analysis.

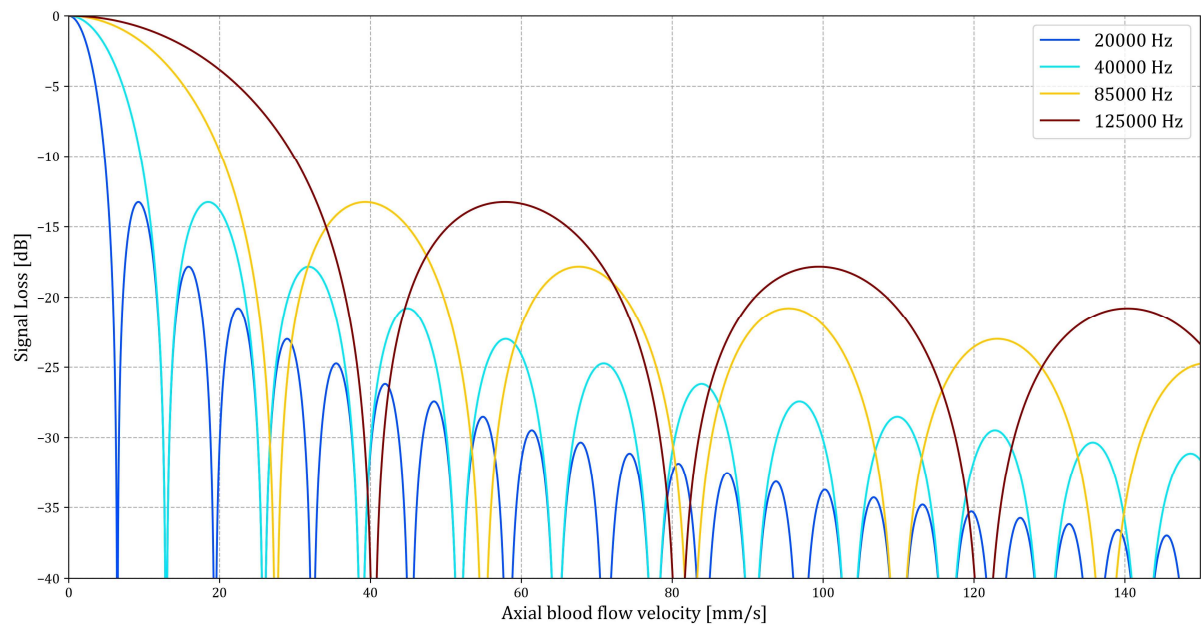

603

604

**Figure 3.** Axial blood flow velocity component calculation. The axial blood flow velocity is calculated at SNR

605

drops for the four nominal acquisition rates of 20, 40, 85 and 125 kHz. As seen, several potential axial blood flow

606

velocities are based on a single signal-to-noise ratio (SNR) drop. The numerical solutions to the equation were

607

used to generate the blood flow profiles in the time-resolved dynamic OCT acquisitions. The values here

608

represent the calculated velocities in mm/s, where the SNR drop is compared against a known reference SNR.

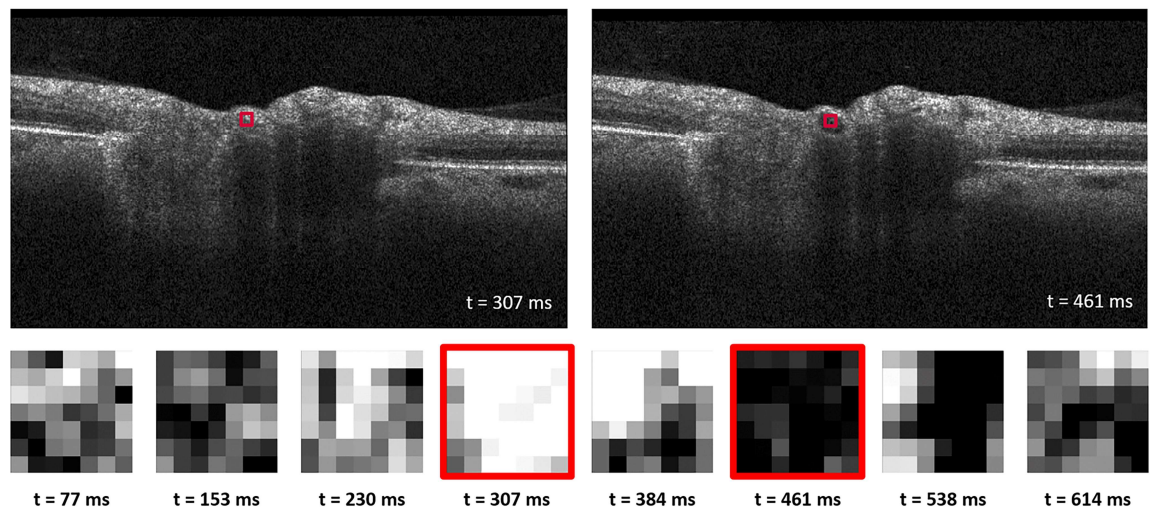

**a**

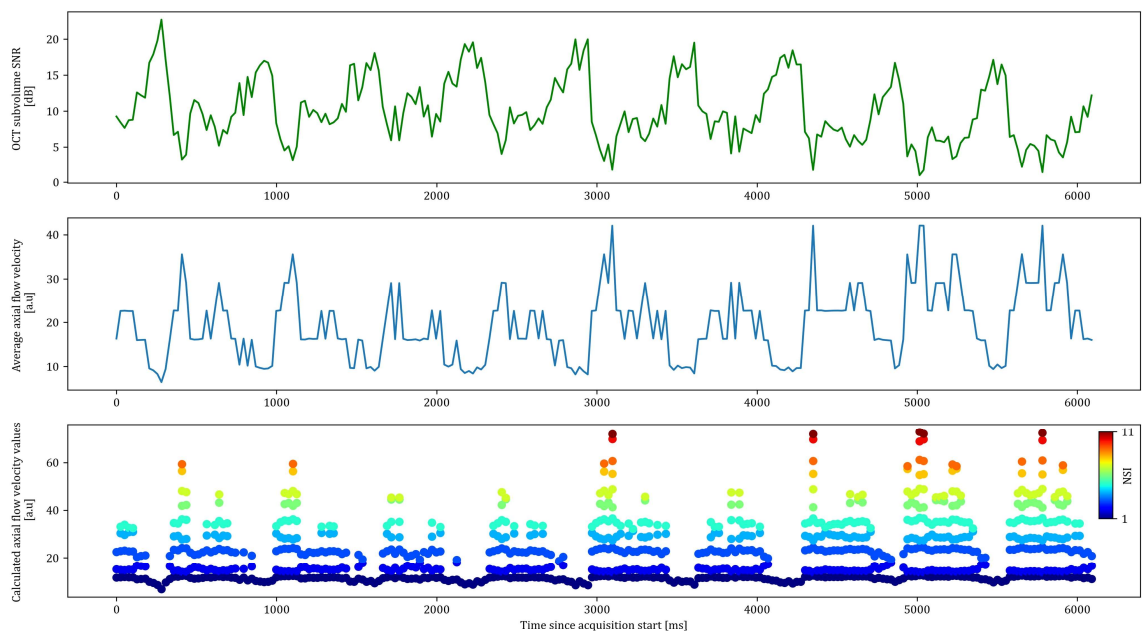

**b**

609

610 **Figure 4.** Time-resolved optical coherence tomography (OCT) B-scans of optic nerve head vessels. **a** Imaging  
 611 was performed at the same location. Two B-scans and eight extracted  $7 \times 7$  pixel arterial subvolumes ( $20 \times$   
 612  $27 \mu\text{m}$ ) are shown with timestamps. The corresponding subvolumes are framed in red, where the red frame on  
 613 the original B-scan is enlarged for better visualisation. The intensity changes in the subvolume occur due to  
 614 varying fringe washout of the arterial signal over time. **b** Analysis of retinal blood flow dynamics over 6 s in an  
 615 artery with time-resolved OCT (A-scan integration time of  $22.4 \mu\text{s}$ , inter-B-scan interval of  $\sim 25$  ms). Timestamp-  
 616 matched mean SNR of the OCT subvolume (top row), average axial flow velocity (middle row) and calculated  
 617 axial flow velocity values (bottom row) are presented. The average axial flow velocity line (middle row) represents  
 618 the average of the numerical solutions, and the dots (bottom row) represent all numerical solutions to the  $\text{SNR}_{\text{Drop}}$   
 619 equation. dB: decibel, a.u.: arbitrary unit, NSI: numerical solution index.

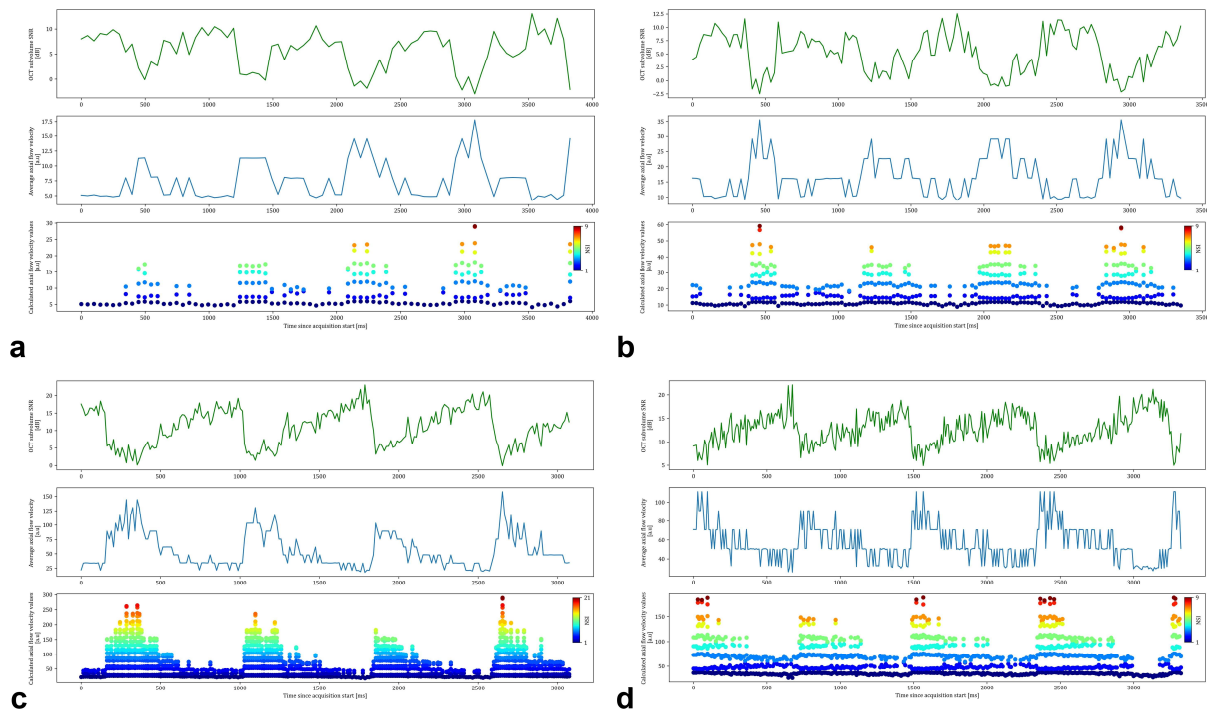

620

621 **Figure 5.** Calculated flow velocity profiles of time-resolved OCT intensity at the four different nominal acquisition  
622 rates (a 20 kHz, b 40 kHz, c 85 kHz and d 125 kHz). Each subfigure shows the acquisition duration in ms from  
623 the start on the x-axis. On the y-axes, the mean OCT SNR from the subvolume can be found on the top row, the  
624 average flow velocity (average of the numerical solutions to the  $SNR_{Drop}$  equation) in blue on the middle row and  
625 the calculated flow profiles (all numerical solutions) as dots on the bottom row.

626

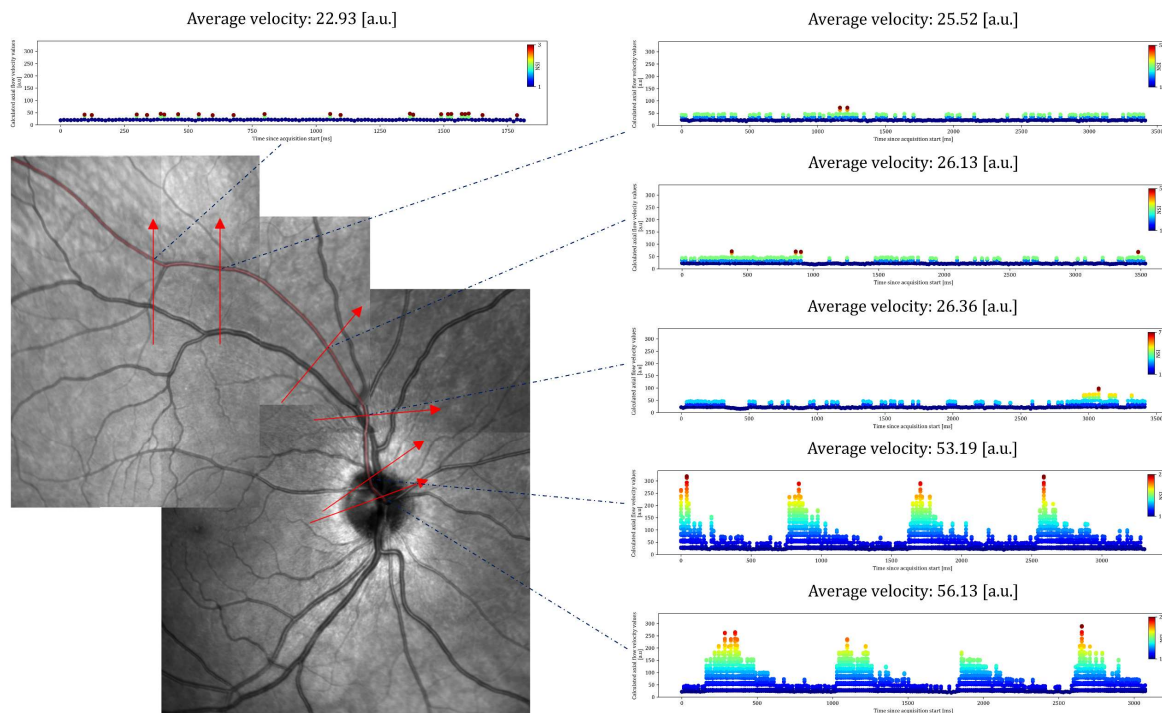

627

628 **Figure 6.** En-face representation of time-resolved acquisitions along an artery. The montage scanning laser  
629 ophthalmoscopy (SLO) of different acquisitions in the bottom left indicates the OCT acquisition locations as  
630 arrows, and the analysed artery is presented in transparent red. The corresponding time-resolved dynamic blood  
631 flow profiles show a clear pulsatility close to the optic nerve head centre, which diminishes beyond the optic  
632 nerve head rim. The estimated average blood flow velocities decrease from the optic nerve head centre towards  
633 the periphery.



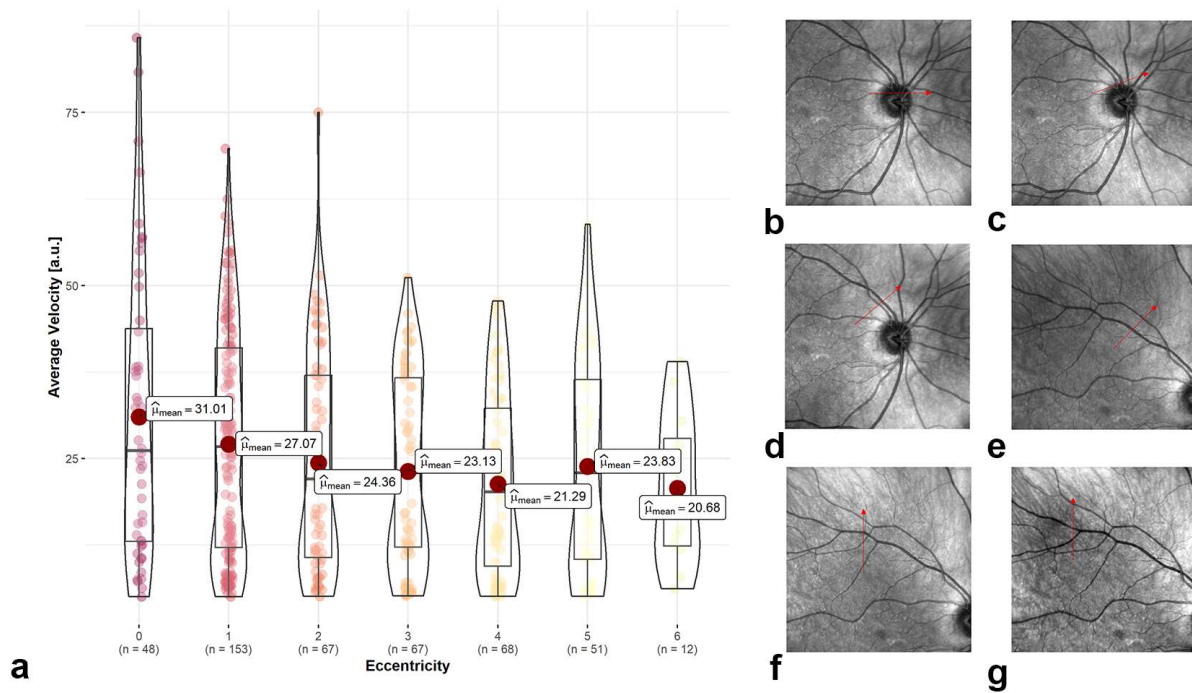

634

635 **Figure 7. a** Estimated average blood flow velocity of the measured vessels at different eccentricities represented  
 636 as violin-boxplots and with the means highlighted as red dots. **b–g** Example scanning laser ophthalmoscopy  
 637 (SLO) acquisitions with the positioning of the continuous B-scans highlighted by a red arrow corresponding to  
 638 eccentricities 0–5. **b**  $\triangleq$  0: Optic nerve head centre, **c**  $\triangleq$  1: Neuroretinal rim, **d**  $\triangleq$  2: eccentricity of 1 optic disc  
 639 diameter (ODD) from the neuroretinal rim, **e**  $\triangleq$  3: eccentricity of 2 ODDs from the neuroretinal rim, **f**  $\triangleq$  4:  
 640 eccentricity of 3 ODDs from the neuroretinal rim, **g**  $\triangleq$  5: eccentricity of 4 ODDs from the neuroretinal rim.



641 **Supplementary Material**

642 **Supplementary Video 1**

643 Time-resolved dynamic optical coherence tomography of an artery (cross-sectional)  
644 at the centre of the optic nerve head.

645

646 **Supplementary Video 2**

647 Time-resolved dynamic optical coherence tomography of an artery (longitudinal) at  
648 the centre of the optic nerve head.

649

650 **Supplementary Video 3**

651 Comparison of time-resolved dynamic optical coherence tomography with  
652 corresponding blood flow velocity profiles at four different integration times.
